# Supplementary material
Source: PubMed Central journal article supplement (PMC3502906)
Supplement: AEM.02580-12_zam999103920so1.pdf [file AEM.02580-12_zam999103920so1.pdf]

**Supplementary Material:**

Temperature influences the physiology and virulence of the insect pathogen *Serratia* sp. SCBI.

Lauren M. Petersen and Louis S. Tisa

Supplementary Figure 1: Swim ring formation of *Serratia* sp. SCBI and *S. marcescens* Db11.

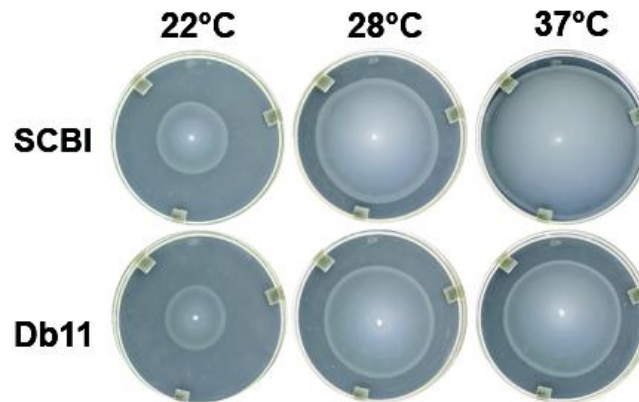

Legend to Supplementary Figure 1: Temperature influences swimming behavior as measured by the swim ring migration assay for *Serratia* sp. SCBI (SCBI) and *S. marcescens* Db11 (Db11).

Photographs are of the swim rings at 10 h at 22, 28 and 37°C.

Supplementary Figure 2: Swarming motility of *Serratia* sp. SCBI and *S. marcescens* Db11.

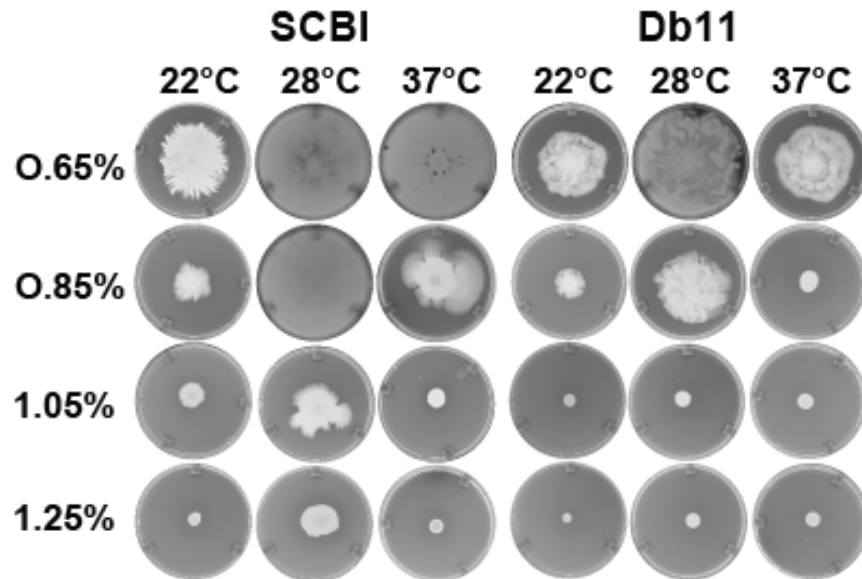

Legend to Supplementary Figure 2: Both temperature and agar concentration influenced swarm ring formation. Overnight cultures of *Serratia* sp. SCBI (SCBI) and *S. marcescens* Db11 (Db11) were spot inoculated onto the surface of Protease Peptone 3 swarming medium containing varying agar concentrations (w/v) and incubated for 48 h at the test temperatures. Photographs are of swarm migration plates incubated at the test temperature after 48 h.

Supplementary Figure 3: Protease and lipase activity of *Serratia* sp. SCBI and *S. marcescens* Db11.

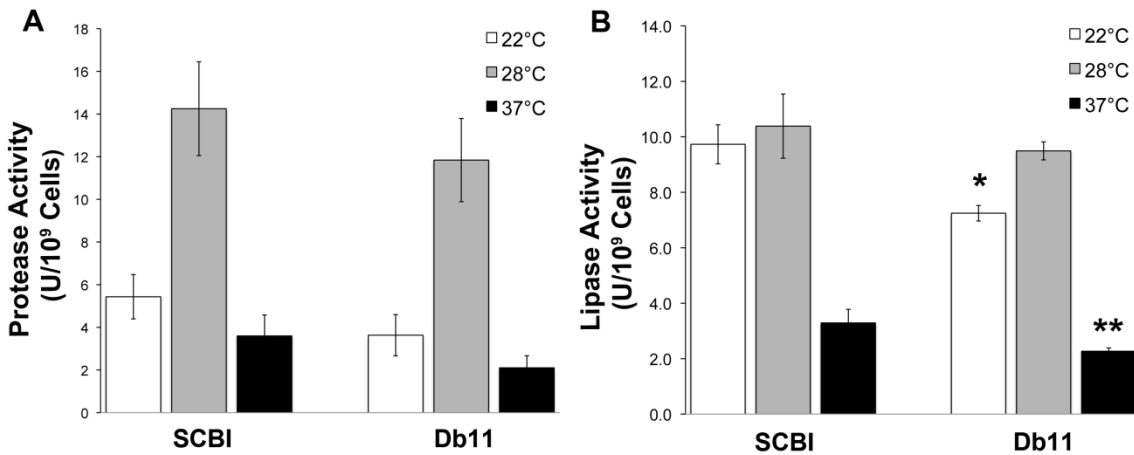

Legend to Supplementary Figure 3: Temperature influenced exoenzyme activity. Cultures of *Serratia* sp. SCBI and *S. marcescens* Db11 were grown at the test temperature and the supernatant of the bacterial culture was assayed for protease and lipase activity using a quantitative liquid assay. (A) Protease Activity. (B) Lipase activity. Bar types represent values for each temperature: 22°C (open bars), 28°C (grey bars) and 37°C (filled bars). Values are the average of 3 measurements from 2 independent experiments (3 measurements each), with the standard deviations indicated by error bars. \*\*,  $P < 0.01$  and \*,  $P < 0.001$  denote significant differences compared to *Serratia* sp. SCBI at the same temperature.

Supplementary Figure 4: Effects of *Serratia* sp. SCBI and *E. coli* EPI300 infection on *M. sexta*.

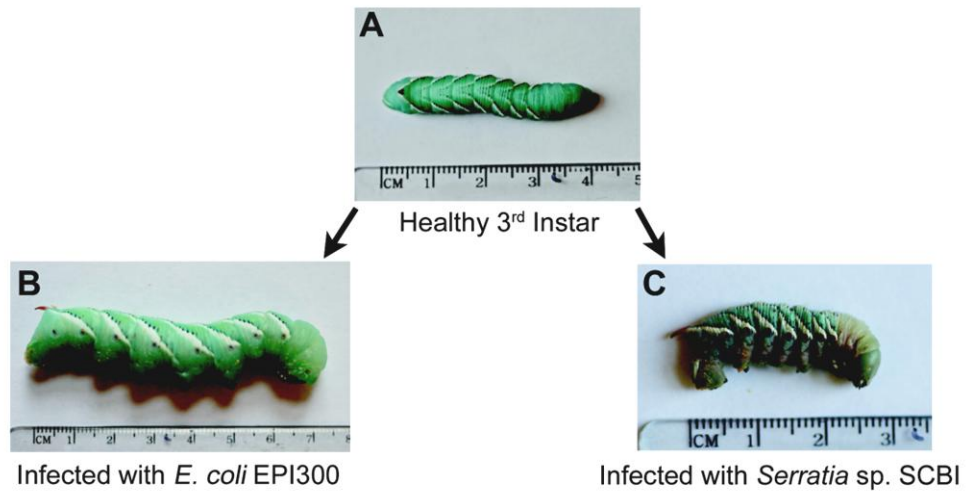

Legend to Supplementary Figure 4: *Serratia* sp. SCBI arrested *M. sexta* development. Photographs of (A) a healthy 3<sup>rd</sup> instar larva, (B) a 5<sup>th</sup> instar larva inoculated with  $\geq 10^5$  CFU *E. coli* EPI300 after 7 days incubation and (C) a larva inoculated with  $\geq 4.0 \times 10^4$  *Serratia* sp. SCBI after 7 days incubation at 22°.

Supplementary Table 1. Effect of temperature on secreted activities of *Serratia* sp.

| Activity                 | <i>Serratia</i> sp. SCBI |          |          | <i>S. marcescens</i> Db11 |           |          |
|--------------------------|--------------------------|----------|----------|---------------------------|-----------|----------|
|                          | 22°C                     | 28°C     | 37°C     | 22°C                      | 28°C      | 37°C     |
| DNase <sup>a</sup>       | 4.3 ±0.5                 | 5.0 ±0.7 | 5.4 ±0.6 | 3.8 ±0.4                  | 5.3 ±0.9  | 5.0 ±0.6 |
| Siderophore <sup>b</sup> | 5.8 ±0.5                 | 5.5 ±0   | 3.5 ±0.4 | 4.1 ±0.4**                | 5.0 ±0.4  | 4.3 ±0.3 |
| Gelatinase <sup>b</sup>  | 6.0 ±0.5                 | 7.6 ±0.9 | 9.2 ±1.9 | 4.8 ±0.7                  | 7.5 ±1.2  | 8.8 ±1.6 |
| Chitinase <sup>c</sup>   | 6.4 ±0.8                 | 8.8 ±0.4 | 8.5 ±0.9 | 2.1 ±0.4*                 | 6.3 ±0.7* | 8.2 ±0.5 |

Indicator plates were spot inoculated with bacteria that had been grown overnight in LB broth. The plates were incubated for 24 h, 48 h, or 7 days at the test temperature. The radius of the clearing zones were measured. These values were expressed as mm and values are the average of 4 measurements, with standard deviations indicated by  $\pm$ . \*\*,  $P < 0.01$  and \*,  $P < 0.001$  denote significant differences compared to *Serratia* sp. SCBI at the same temperature.

<sup>a</sup> The clearing zone was measured at 24 h.

<sup>b</sup> The clearing zone was measured at 48 h.

<sup>c</sup> The clearing zone was measured at 7 days.
